# Supplementary material
Source: PubMed Central journal article supplement (PMC4238104)
Supplement: NIHMS587491-supplement-01.pdf [file NIHMS587491-supplement-01.pdf]

## Appendix A: Supplementary tables

**Table A1: Comparison of full and analytic sub-sample for key variables**

| Variable                                      | Full Sample |      | Analytic Sample |      |
|-----------------------------------------------|-------------|------|-----------------|------|
|                                               | Mean        | S.D. | Mean            | S.D. |
| Household wealth                              | -0.13       | 1.8  | -0.09           | 1.7  |
| % Fostered a child                            | 19.3        | 0.4  | 19.4            | 0.4  |
| Household Size                                | 5.1         | 2.2  | 4.8             | 2.2  |
| Years of Education                            | 7.4         | 2.7  | 7.3             | 2.7  |
| % Married                                     | 41.4        | 0.5  | 44.1            | 0.5  |
| % Student                                     | 36.9        | 0.5  | 34.1            | 0.5  |
| Monthly Income ( <i>thousands of Kwacha</i> ) | 2.3         | 7.2  | 2.3             | 7.0  |
| Moved house                                   | 12.8        | 0.3  | 12.6            | 0.3  |
| Person-waves                                  | 14,555      |      | 10,987          |      |
| Individuals                                   | 2080        |      | 1754            |      |

**Table A2: Cross-sectional description of sample at the beginning of the observed interval (Wave 2)**

| Variable                                      | Mean  | S.D. | Range        |
|-----------------------------------------------|-------|------|--------------|
| Household wealth                              | -0.11 | 1.73 | -1.85 – 8.15 |
| Household Size                                | 5.10  | 2.18 | 1 – 14       |
| Years of Education                            | 7.11  | 2.72 | 0 – 13       |
| % Married                                     | 39.00 | 0.49 | 0 – 1        |
| % Student                                     | 43.1  | 0.50 | 0 – 1        |
| Monthly Income ( <i>thousands of Kwacha</i> ) | 2.35  | 8.37 | 0 – 250      |
| (N=1684 individuals)                          |       |      |              |

**Table A3: Wave 1 predictors of fostering in Wave 2**

|                                               | <b>Odds Ratio</b>   |
|-----------------------------------------------|---------------------|
| Anticipation level                            | 1.053*<br>(0.026)   |
| Household wealth                              | 1.180***<br>(0.052) |
| Married                                       | 1.820**<br>(0.383)  |
| Gender ( <i>ref. = male</i> )                 | 1.195<br>(0.239)    |
| Years of Education                            | 1.061<br>(0.036)    |
| Age                                           | 0.970<br>(0.031)    |
| Monthly Income ( <i>thousands of Kwacha</i> ) | 1.00<br>(0.014)     |
| Constant                                      | 0.084***<br>(0.050) |
| Individuals                                   | 1668                |

Notes: Standard errors in parentheses; all predictor variables measured at wave 1. \*\*\* p<0.001, \*\* p<0.01, \* p<0.05

**Table A4: Fixed effects regression model of the independent effect of anticipation on household wealth**

|                                                  | <b>Coefficient</b>   |
|--------------------------------------------------|----------------------|
| Fostering ( <i>ref.</i> = <i>non-fosterers</i> ) | 0.022<br>(0.032)     |
| Anticipation of Fostering                        | -0.001<br>(0.003)    |
| Time                                             | 0.026***<br>(0.004)  |
| Constant                                         | -0.219***<br>(0.021) |
| Person Waves                                     | 10,987               |
| Individuals                                      | 1754                 |
| <i>Within individual R</i> <sup>2</sup>          | <i>0.006</i>         |

Notes: Standard errors in parentheses. \*\*\* p<0.001, \*\* p<0.01, \* p<0.05

## **Appendix B: Expanding the definition of anticipated and surprised fostering**

Supplementary analyses explored the effect of anticipation using different cut-points to define surprised and anticipated fostering. Expanding the definition of surprised fostering to include those who selected either a 0- or 1-bean chance of fostering and anticipated fostering to include respondents who selected either a 9- or 10-bean chance of fostering produced similar results. Table B1 shows the results of the multivariate analyses using these new categorical definitions. Anticipated fosterers under the expanded definition continue to experience a significantly larger increase in wealth than their non-fostering counterparts. But unlike Model 4 in Table 4, uncertain fosterers do not experience a statistically distinguishable change in wealth under this new definition, suggesting that the effect of uncertain fostering is less robust than that of anticipated fostering. Furthermore, households that fostered out of anticipation under this expanded definition continue to show a significantly greater increase in wealth than their surprised counterparts (p<0.01, model not shown).

**Table B1: Fixed effects regression models of the effect on household wealth by anticipatory fostering status (expanded anticipation cut-points)**

|                                                  | <b>Model 1</b>       | <b>Model 2</b>       |
|--------------------------------------------------|----------------------|----------------------|
| Time                                             | 0.026***<br>(0.004)  | 0.024***<br>(0.004)  |
| <i>Prior Anticipation (ref. = non-fosterers)</i> |                      |                      |
| Surprised Fostering                              | -0.049<br>(0.057)    | 0.007<br>(0.057)     |
| Anticipated Fostering                            | 0.171**<br>(0.066)   | 0.202**<br>(0.065)   |
| Uncertain Fostering                              | -0.004<br>(0.040)    | 0.044<br>(0.038)     |
| <i>Sociodemographic controls</i>                 |                      |                      |
| Household Size                                   |                      | 0.064***<br>(0.007)  |
| Years of Education                               |                      | 0.047*<br>(0.020)    |
| Student                                          |                      | 0.099**<br>(0.033)   |
| Married                                          |                      | 0.141***<br>(0.036)  |
| Monthly Income ( <i>thousands of Kwacha</i> )    |                      | 0.006***<br>(0.002)  |
| Household Move                                   |                      | 0.023<br>(0.025)     |
| Constant                                         | -0.222***<br>(0.019) | -0.981***<br>(0.150) |
| Person-waves                                     | 10,987               | 10,987               |
| Individuals                                      | 1754                 | 1754                 |
| <i>Within individual R<sup>2</sup></i>           | <i>0.007</i>         | <i>0.020</i>         |

Notes: Standard errors in parentheses. \*\*\* p<0.001, \*\* p<0.01, \* p<0.05
